# Supplementary material
Source: MDPI journal article supplement (https://www.mdpi.com/search?q=sustainability-11-02591)
Supplement: s001 [file sustainability-11-02591-s001.docx]

Supplementary Materials

**Table S1.** Abbreviated names of China's Sectors.

| **Sectors** | **Abbreviated name** | **city** |
| --- | --- | --- |
| Agriculture, Hunting, and Fishing | AG |  |
| Mining and Washing of Coal | MI |  |
| Exploitation of petroleum and natural gas and conventional natural gas industry | EX |  |
| Metals Mining and Dressing | ME |  |
| Nonmetal Minerals Mining and Dressing | NM |  |
| Food, Beverages and Tobacco | FT |  |
| Textiles | TE |  |
| Textile Products, Leather, feather and other products | WA |  |
| Timber processing and furniture manufacturing | SF |  |
| Paper Printing and educational and sports goods | PP |  |
| Petroleum processing, coking and nuclear fuel processing | PN | Shanghai |
| Chemical industry | CH | Tianjin Shanghai |
| Nonmetal Mineral Products | NP |  |
| Smelting and Pressing of Metals | MS | Tianjin Chongqing |
| Metal Products industry | MP |  |
| General equipment manufacturing | GM |  |
| Special equipment manufacturing | SP |  |
| Transport and Equipment industry | TR | Beijing Shanghai Chongqing |
| Electric Equipment and Machinery manufacturing industry | ET | Chongqing |
| Communication equipment, Computers and other electronic equipment manufacturing | EE | Chongqing |
| Instrumentation | IM |  |
| Other Manufacturing | OM |  |
| Waster and Flotsam | SW |  |
| Metal products, Machinery and Equipment Repair Services | MM |  |
| Product and Supply of Electricity and Heating Industry | ES |  |
| Product and Supply of Gas Industry | GP |  |
| Product and Supply of Water Industry | WP |  |
| Construction | CO | Beijing Tianjin Chongqing |
| Leasing and Business Services | WR |  |
| Transport, Warehousing and Postal Services | TS | Beijing Shanghai |
| Hotels and Catering Services | AF |  |
| Information Transmission, Software and Information Technology Services | TT |  |
| Financial | FI |  |
| Real Estate | RE |  |
| Leasing and Business Services | RB |  |
| Scientific research and Technical services | ST |  |
| Water conservancy, environment and public facilities management industry | WE |  |
| Services to Households and Other Services | PS |  |
| Education industry | ED |  |
| Sanitation, Social Security and Social Welfare | SS |  |
| Culture,Sports and Entertainment industry | ES |  |
| Public Management and Social Organization | PA |  |

**Table S2.** Detailed embodied flows between four megacities and other regions of China in 2012 (units: million tons).

|  |  | **Import** |  |  |  | **Export** |  |  |  |
| --- | --- | --- | --- | --- | --- | --- | --- | --- | --- |
| Code | **Region** | Beijing | Tianjin | Shanghai | Chongqing | Beijing | Tianjin | Shanghai | Chongqing |
| 1 | Beijing | 0 | 18 | 5 | 2 | 0 | 27 | 4 | 2 |
| 2 | Tianjin | 27 | 0 | 4 | 1 | 18 | 0 | 3 | 2 |
| 3 | Hebei | 34 | 17 | 13 | 8 | 17 | 6 | 5 | 3 |
| 4 | Shanxi | 17 | 1 | 8 | 1 | 5 | 3 | 3 | 2 |
| 5 | Inner mongolia | 21 | 5 | 10 | 4 | 8 | 5 | 6 | 5 |
| 6 | Liaoning | 15 | 11 | 12 | 5 | 9 | 4 | 6 | 2 |
| 7 | Jilin | 6 | 5 | 5 | 2 | 9 | 5 | 7 | 2 |
| 8 | Heihongjiang | 6 | 3 | 5 | 2 | 3 | 2 | 3 | 1 |
| 9 | Shanghai | 4 | 3 | 0 | 3 | 5 | 4 | 0 | 2 |
| 10 | Jiangsu | 11 | 19 | 36 | 7 | 9 | 5 | 20 | 5 |
| 11 | Zhejiang | 4 | 3 | 29 | 3 | 4 | 2 | 18 | 2 |
| 12 | Anhui | 5 | 5 | 16 | 4 | 4 | 2 | 9 | 2 |
| 13 | Fujian | 1 | 1 | 3 | 1 | 0 | 0 | 1 | 1 |
| 14 | Jiangxi | 2 | 1 | 4 | 2 | 2 | 1 | 2 | 1 |
| 15 | Shandong | 9 | 5 | 6 | 2 | 11 | 4 | 3 | 2 |
| 16 | Henan | 12 | 8 | 13 | 11 | 10 | 4 | 10 | 6 |
| 17 | Hubei | 1 | 1 | 2 | 1 | 1 | 0 | 0 | 1 |
| 18 | Hunan | 3 | 2 | 6 | 8 | 2 | 1 | 4 | 6 |
| 19 | Guangdong | 3 | 2 | 7 | 6 | 3 | 1 | 4 | 5 |
| 20 | Guangxi | 1 | 1 | 2 | 4 | 2 | 1 | 4 | 8 |
| 21 | Hainan | 1 | 0 | 1 | 1 | 0 | 0 | 1 | 1 |
| 22 | Chongqing | 2 | 2 | 2 | 0 | 2 | 1 | 3 | 0 |
| 23 | Sichuan | 2 | 1 | 2 | 11 | 1 | 0 | 1 | 6 |
| 24 | Guizhou | 2 | 1 | 3 | 11 | 1 | 1 | 2 | 4 |
| 25 | Yunnan | 2 | 1 | 3 | 8 | 2 | 1 | 3 | 10 |
| 26 | Shannxi | 4 | 2 | 9 | 8 | 5 | 3 | 5 | 9 |
| 27 | Gansu | 3 | 1 | 2 | 5 | 1 | 1 | 1 | 2 |
| 28 | Qinghai | 0 | 0 | 0 | 1 | 0 | 0 | 1 | 1 |
| 29 | Ningxia | 2 | 0 | 1 | 2 | 1 | 0 | 0 | 0 |
| 30 | Xinjiang | 2 | 1 | 4 | 3 | 2 | 1 | 3 | 3 |
|  | **Total** | **202** | **118** | **211** | **124** | **138** | **87** | **131** | **95** |

**Table S3.** Detailed embodied flows between four megacities and other regions of China in 2007(units: million tons).

|  |  | **Import** |  |  |  | **Export** |  |  |  |
| --- | --- | --- | --- | --- | --- | --- | --- | --- | --- |
| Code | **Region** | Beijing | Tianjin | Shanghai | Chongqing | Beijing | Tianjin | Shanghai | Chongqing |
| 1 | Beijing | 0 | 4 | 7 | 2 | 0 | 4 | 6 | 3 |
| 2 | Tianjin | 8 | 0 | 7 | 3 | 8 | 0 | 5 | 3 |
| 3 | Hebei | 53 | 24 | 38 | 7 | 10 | 6 | 8 | 4 |
| 4 | Shanxi | 5 | 2 | 4 | 0 | 3 | 1 | 3 | 1 |
| 5 | Inner mongolia | 16 | 13 | 14 | 3 | 3 | 1 | 3 | 1 |
| 6 | Liaoning | 10 | 6 | 8 | 2 | 5 | 3 | 4 | 0 |
| 7 | Jilin | 5 | 4 | 6 | 1 | 5 | 3 | 3 | 1 |
| 8 | Heihongjiang | 6 | 3 | 5 | 1 | 4 | 2 | 6 | 0 |
| 9 | Shanghai | 6 | 2 | 0 | 2 | 7 | 4 | 0 | 3 |
| 10 | Jiangsu | 9 | 4 | 21 | 3 | 9 | 6 | 10 | 2 |
| 11 | Zhejiang | 4 | 2 | 29 | 2 | 6 | 6 | 15 | 2 |
| 12 | Anhui | 5 | 2 | 17 | 1 | 3 | 2 | 6 | 2 |
| 13 | Fujian | 2 | 1 | 4 | 1 | 2 | 1 | 4 | 1 |
| 14 | Jiangxi | 1 | 1 | 4 | 0 | 1 | 1 | 2 | 1 |
| 15 | Shandong | 7 | 4 | 24 | 2 | 5 | 2 | 5 | 2 |
| 16 | Henan | 6 | 5 | 21 | 4 | 5 | 3 | 8 | 4 |
| 17 | Hubei | 1 | 1 | 5 | 2 | 1 | 1 | 1 | 1 |
| 18 | Hunan | 2 | 1 | 6 | 2 | 1 | 1 | 2 | 2 |
| 19 | Guangdong | 6 | 3 | 15 | 14 | 3 | 4 | 12 | 10 |
| 20 | Guangxi | 2 | 1 | 4 | 4 | 2 | 1 | 2 | 3 |
| 21 | Hainan | 0 | 0 | 0 | 0 | 0 | 0 | 0 | 0 |
| 22 | Chongqing | 3 | 2 | 3 | 0 | 2 | 2 | 2 | 0 |
| 23 | Sichuan | 3 | 2 | 5 | 10 | 1 | 2 | 3 | 4 |
| 24 | Guizhou | 2 | 1 | 6 | 6 | 1 | 1 | 1 | 2 |
| 25 | Yunnan | 2 | 1 | 4 | 6 | 2 | 1 | 3 | 7 |
| 26 | Shannxi | 6 | 3 | 13 | 5 | 3 | 3 | 5 | 2 |
| 27 | Gansu | 3 | 1 | 5 | 1 | 1 | 1 | 1 | 0 |
| 28 | Qinghai | 1 | 1 | 2 | 0 | 0 | 0 | 1 | 0 |
| 29 | Ningxia | 2 | 1 | 2 | 0 | 1 | 1 | 1 | 0 |
| 30 | Xinjiang | 5 | 2 | 6 | 1 | 1 | 3 | 2 | 1 |
|  | **Total** | **180** | **97** | **282** | **85** | **96** | **65** | **123** | **61** |
